# Supplementary material for: 82-kDa choline acetyltransferase and SATB1 localize to β-amyloid induced matrix attachment regions
Source: PubMed Central journal article supplement (PMC4823725; doi:10.1038/srep23914), 2016-04-07
Supplement: srep23914-s1.pdf [file srep23914-s1.pdf]

**82-kDa choline acetyltransferase and SATB1 localize to  $\beta$ -amyloid induced matrix  
attachment regions**

Warren Winick-Ng, Fabiana A Caetano, Jennifer Winick-Ng, Trevor M Morey, Bryan Heit and  
R. Jane Rylett

*Supplemental Figures and Tables*

1 MGLRTAKKRG LGGGGKWKREE GGGTRGRREVRPACFLQSGGRGDPGDVGGPAGNPGC SPHPR 62  
 63 AATRPPPLPAH TPAHTPEW CGAASAEAAEPRRAGPHLCIPAPGLTK TPILIEK VPRKMAAK TPSS EE 128  
 129 SGLPKLPVPPLQOTLATYLQCMRHLVSEEQFRKSQAIVQQFGAPGGLGETLQQKLLERQEKA... 190

Start codon  
  Nuclear localization signal (NLS)  
  Basic residue region  
 S(T)PXX or XPRK motif, 82-kDa region  
 S(T)PXX or XPRK motif, 69-kDa region

**Supplementary Figure S1. DNA binding prediction for 82-kDa ChAT.**

The 118 amino acid residue amino-terminus of 82-kDa ChAT is flanked by two in-frame methionine initiation sites, and contains a unique nuclear localization sequence. Several DNA binding prediction software databases predicted high DNA binding probability at 2 basic residue regions, as well as 5 SPXX/XPRK DNA binding motifs. There was an additional SPXX motif in the 69-kDa ChAT region near the amino terminus with high DNA binding prediction.

**A**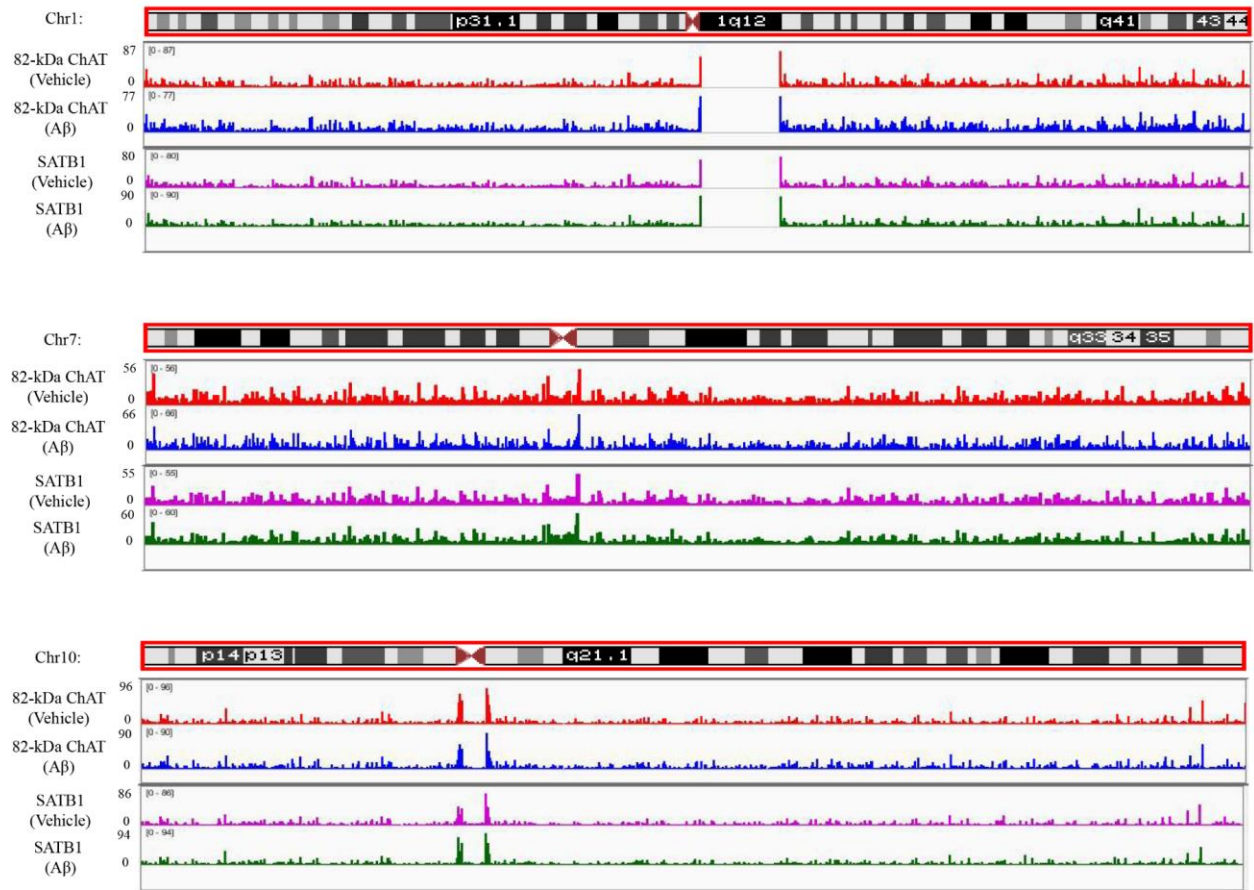

**B**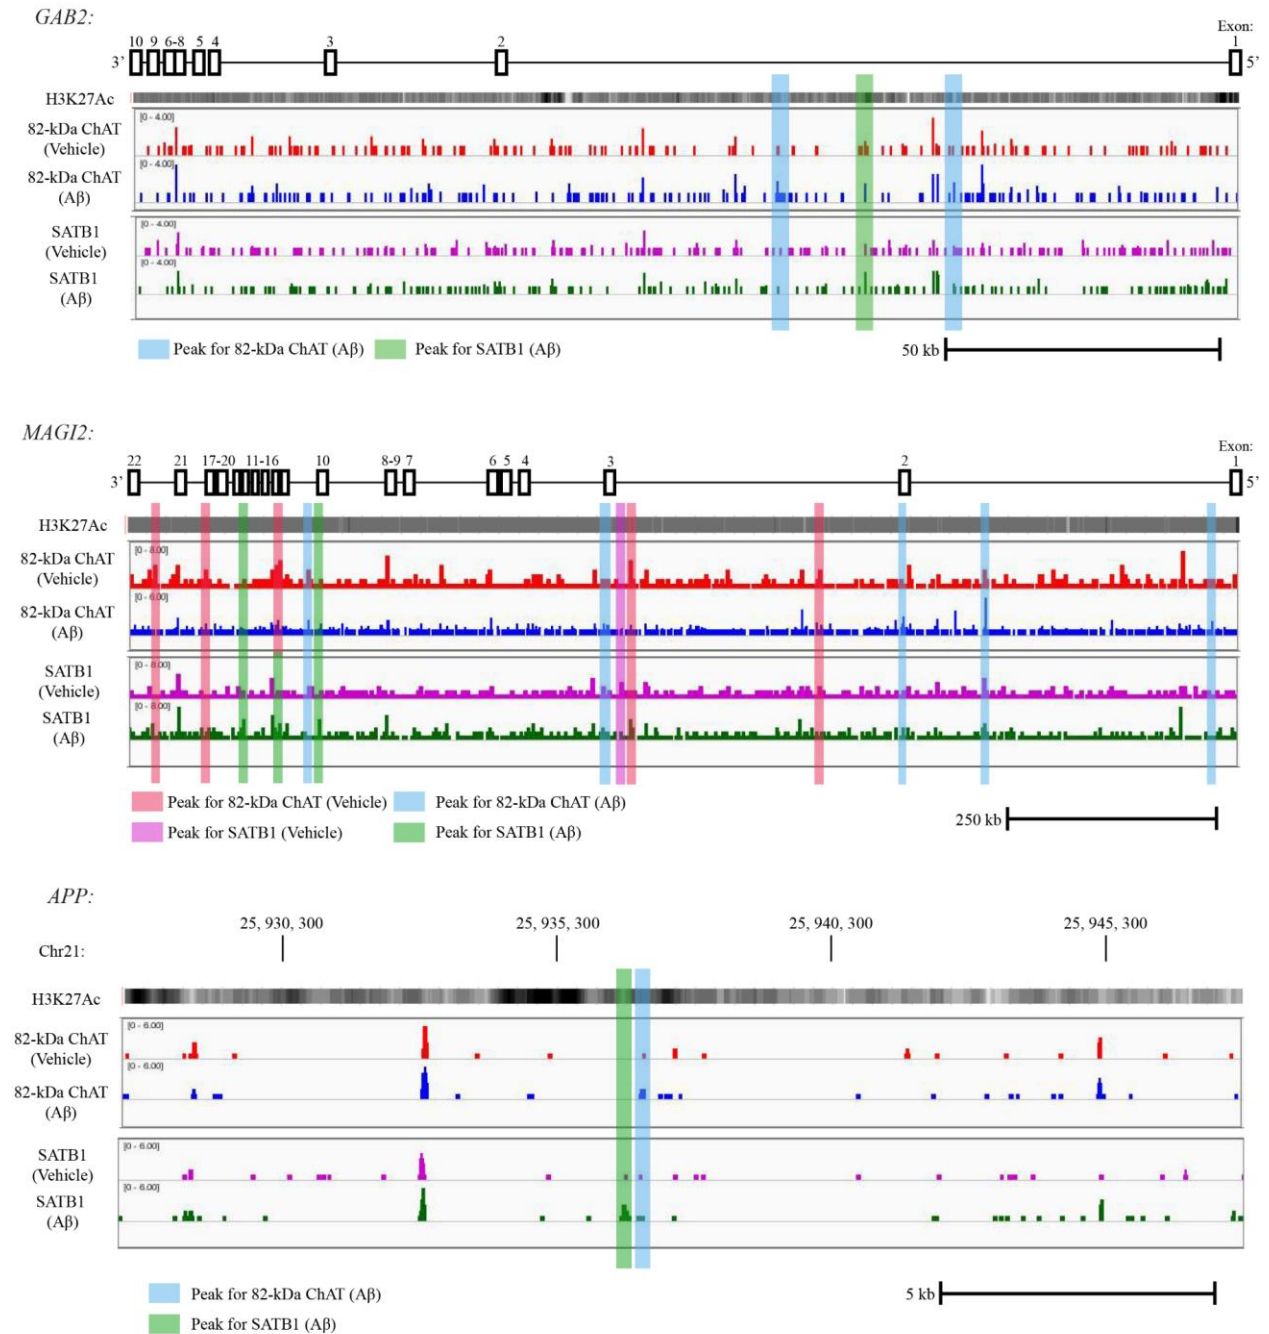

Supplementary Figure S2. Examples of ChIP-seq tracks for 82-kDa ChAT and SATB1.

(A) ChIP-seq tracks for chromosomes 1, 7 and 10 for 82-kDa ChAT and SATB1 in cells treated with either vehicle or A $\beta$ <sub>1-42</sub>. For chromosome 1, there was a portion of data not covered at the

start of the q-arm. No other chromosome had a gap in data coverage. For chromosomes 7 and 10, there was a large peak of coverage flanking the centromeres. (B) ChIP-seq tracks for *GAB2* and *MAGI2* whole genes, as well as for a region of *APP*, for 82-kDa ChAT and SATB1 in cells treated with either vehicle or A $\beta_{1-42}$ . Peaks are highlighted in blue for 82-kDa ChAT A $\beta_{1-42}$  peaks, green for SATB1 A $\beta_{1-42}$  peaks, red for 82-kDa ChAT vehicle peaks, and purple for SATB1 vehicle peaks. H3K27Ac is overlaid to show active transcription initiation sites

**Supplementary Table S3.** Motifs used in S/MAR analysis. Motifs 1-18 were used previously to determine S/MAR association (47), motifs 19-21 are SATB1 binding motifs (36) and motifs 22-26 were identified in a *D. melanogaster* S/MAR study (48).

| Number | Name                           | Motif                                                          |
|--------|--------------------------------|----------------------------------------------------------------|
| 1      | Origin of Replication Signal 1 | ATTA                                                           |
| 2      | Origin of Replication Signal 2 | ATTTA                                                          |
| 3      | Origin of Replication Signal 3 | ATTTTA                                                         |
| 4      | TG-Rich Signal 1               | TGTTTTG                                                        |
| 5      | TG-Rich Signal 2               | TGTTTTTTG                                                      |
| 6      | TG-Rich Signal 3               | TTTTGGGG                                                       |
| 7      | Curved DNA Signal 1            | AAAA(N <sub>7</sub> )AAAA(N <sub>7</sub> )AAAA                 |
| 8      | Curved DNA Signal 2            | TTTT(N <sub>7</sub> )TTTT(N <sub>7</sub> )TTTT                 |
| 9      | Curved DNA Signal 3            | TTTAAA                                                         |
| 10     | Kinked DNA Signal 1            | TA(N <sub>3</sub> )TG(N <sub>3</sub> )CA                       |
| 11     | Kinked DNA Signal 2            | TA(N <sub>3</sub> )CA(N <sub>3</sub> )TG                       |
| 12     | Kinked DNA Signal 3            | TG(N <sub>3</sub> )TA(N <sub>3</sub> )CA                       |
| 13     | Kinked DNA Signal 4            | TG(N <sub>3</sub> )CA(N <sub>3</sub> )TA                       |
| 14     | Kinked DNA Signal 5            | CA(N <sub>3</sub> )TA(N <sub>3</sub> )TG                       |
| 15     | Kinked DNA Signal 6            | CA(N <sub>3</sub> )TG(N <sub>3</sub> )TA                       |
| 16     | mtopo-II Signal                | (A/G)N(T/C)NNCNG(T/C)NG(G/T)TN(T/C)n(T/C)                      |
| 17     | dtopo-II Signal                | GTN(A/T)A(T/C)ATTNATNN(A/G)                                    |
| 18     | AT-Rich Signal                 | (A/T) <sub>6</sub>                                             |
| 19     | SATB1 Motif 1                  | (A/T) <sub>3-n</sub> (C/G)(A/T) <sub>3-6</sub>                 |
| 20     | SATB1 Motif 2                  | (A/T/[C OR G]) <sub>20+</sub>                                  |
| 21     | SATB1 Motif 3                  | (A/T) <sub>2+</sub> (C)(A/T) <sub>2+</sub> ; <i>palindrome</i> |
| 22     | Drosophila MAR Motif 1         | A <sub>12+</sub>                                               |
| 23     | Drosophila MAR Motif 2         | (AG) <sub>8</sub> or (AC) <sub>8</sub>                         |
| 24     | Drosophila MAR Motif 3         | (AGC) <sub>5</sub>                                             |
| 25     | Drosophila MAR Motif 4         | (AACAGC) <sub>2</sub>                                          |
| 26     | Drosophila MAR Motif 5         | (AAAAA[C/G/T]) <sub>2</sub>                                    |

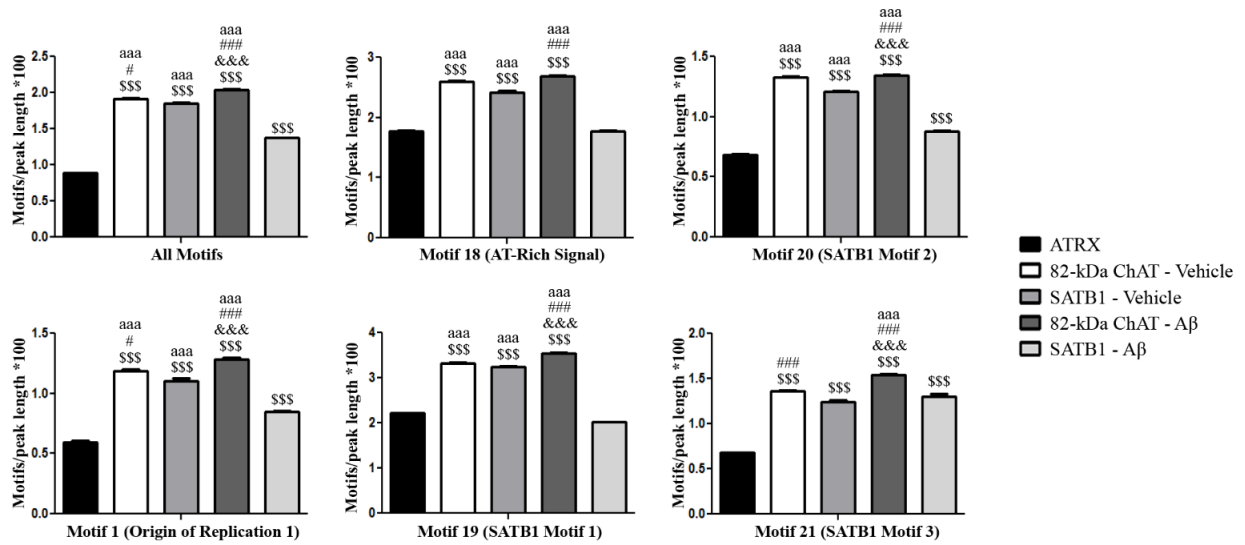

Supplementary Figure S4. **82-kDa ChAT and SATB1 associate with chromatin at S/MARs.**

Mean weighted S/MAR motifs (**Table S3**)/ChIP-seq peak computed as the number of motifs/peak length\*100. Both vehicle and A $\beta_{1-42}$ -treated cells for 82-kDa ChAT and SATB1 had a higher number of weighted motifs/peak compared to ATRX for all motifs. A similar pattern was found for the 5 highest represented motifs. \$\$\$ p < 0.001 compared to ATRX, aaa p < 0.001 compared to A $\beta_{1-42}$ -treated SATB1, &&& p < 0.001 compared to vehicle-treated 82-kDa ChAT, and ### p < 0.001 and # p < 0.05 compared to vehicle-treated SATB1.

**Supplementary Table S5.** G-quadruplex ( $G_3+N_{1-20}G_3+N_{1-20}G_3+N_{1-20}G_3+$ ) motifs found in ChIP-seq datasets.

| Sample                   | Peaks with G-Quadraplex motifs | Total G-Quadraplex motifs |
|--------------------------|--------------------------------|---------------------------|
| ATRX                     | 732                            | 1327                      |
| 82-kDa ChAT (Vehicle)    | 113                            | 204                       |
| SATB1 (Vehicle)          | 60                             | 109                       |
| 82-kDa ChAT (A $\beta$ ) | 89                             | 121                       |
| SATB1 (A $\beta$ )       | 30                             | 41                        |



**Supplementary Table S6.** ChIP-qPCR and RT-qPCR primers.

| <b>Gene</b>      | <b>Direction</b> | <b>Primer, 5'-3'</b>  |
|------------------|------------------|-----------------------|
| <i>ChIP-qPCR</i> |                  |                       |
| Human APP        | Forward          | GCCAGACCACAACCTCGTTT  |
|                  | Reverse          | TTGGGAACTTGCGTGGCAA   |
| <i>RT-qPCR</i>   |                  |                       |
| Human SATB1      | Forward          | GTAGAGCTAGCGAGGGAGAGA |
|                  | Reverse          | TTGTTGTTGTGACGAGGCCG  |
| Human Total APP  | Forward          | AACCAGTGACCATCCAGAAC  |
|                  | Reverse          | ACTTGTCAGGAACGAGAAGG  |
| Human APP-KPI    | Forward          | GTCTGTGGAAGAGGTGGTTC  |
|                  | Reverse          | GTCAAAGTTGTTCCGGTTG   |
| Human GAPDH      | Forward          | TGTTGCCATCAATGACCCCTT |
|                  | Reverse          | CTCCACGACGTA CT CAGCG |

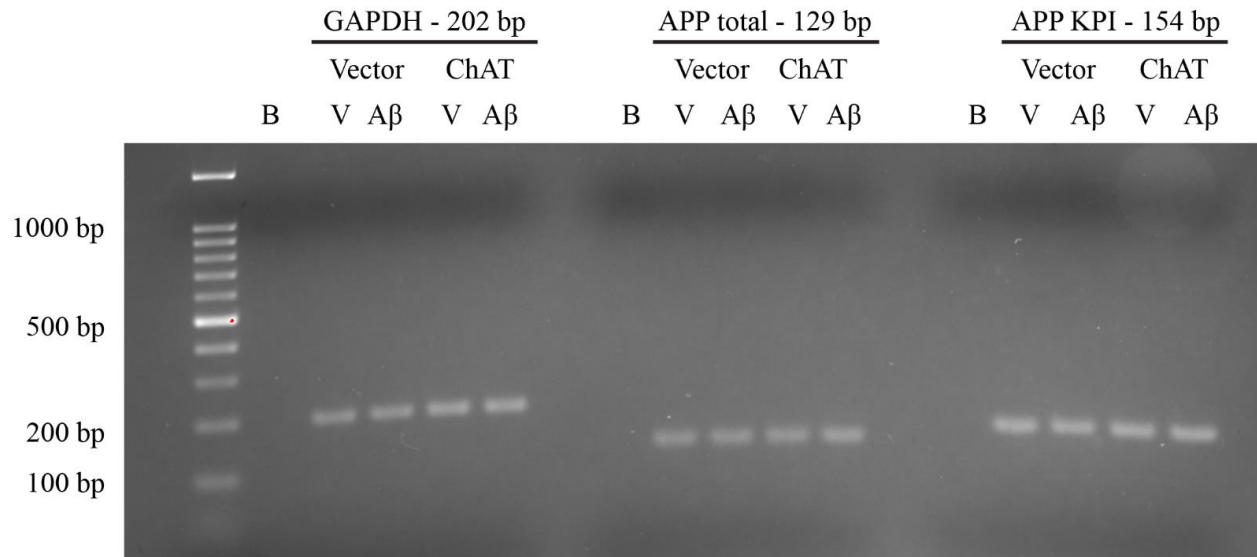

Supplementary Figure S7. **Representative PCR gel for primers used in RT-qPCR**

**experiments.** SH-SY5Y cells stably expressing either an empty vector or 82-kDa ChAT were treated with either vehicle or 100 nM oligomeric A $\beta$ <sub>1-42</sub>. Total RNA was extracted and reverse transcribed prior to PCR amplification with primers specific to *GAPDH*, total *APP* or *APP-KPI* mRNA. For all primer sets, there was a single PCR product at the predicted size.
